# Supplementary material for: Reduction of p53 by Knockdown of the UGT1 Locus in Colon Epithelial Cells Causes an Increase in Tumorigenesis
Source: PubMed Central journal article supplement — Cell Mol Gastroenterol Hepatol. 2015 Oct 13;2(1):63–76.e5. doi: 10.1016/j.jcmgh.2015.08.008 (PMC4721636; doi:10.1016/j.jcmgh.2015.08.008), 2015-10-13
Supplement: NIHMS729760-supplement-supplement_1.pdf [file NIHMS729760-supplement-supplement_1.pdf]

**Supplemental Figure 1. Quantitation of Western blots following UGT1A silencing in LS180 and HT29 colon epithelial cells.** Western blots from actinomycin D and etoposide treated cells from LS180 (**Figure 1B**) and HT29 (**Figure 1C**) cells were quantitated using imaging software from the BioRad ChemiDoc Touch Imaging System and plotted as Relative Signal Intensity or t/c (target protein/internal reference protein-GAPDH). Statistically significant differences in inducible p53 expression along with p21, Bax, caspase 3 and caspase 9 expressions were demonstrated following knockdown of the *Ugt1a* locus in these cells.

**Supplemental Figure 2. Western blot quantitation following treatment with DSS.** Following treatment with DSS, colon tissue was collected from *Ugt1<sup>F/F</sup>* and *Ugt1<sup>ΔIEC</sup>* mice and Western blots performed on total cell extracts (**Figure 4**). Quantitation of the proteins were conducted and plotted as relative values from three separate experiments.

**Supplemental Figure 3. No marked changes in the severity of ulcer or inflammatory gene expression in colon tissues between *Ugt1<sup>ΔIEC</sup>* and *Ugt1<sup>F/F</sup>* mice following DSS treatment.** Colon tissues from 3% DSS-treated or untreated *Ugt1<sup>ΔIEC</sup>* and *Ugt1<sup>F/F</sup>* mice were used to prepare total samples of total RNA. (A) Expression of inflammatory genes was quantitated by real-time PCR, and normalized to the level of cyclophilin mRNA. (B) Colitis score quantified by stool occult blood, rectal prolapse, and diarrhea. Results are presented as mean ± SD of at least four mice. (C) Quantification of the number of ulcers by analyzing H&E-stained sections. (D) Colon ulcers are shown by H&E staining (200 X Magnification).

**Supplemental Figure 4.** Western blot quantitation following AOM (A) and DSS (D) treatment as outlined in Figure 6A.

**Supplemental Figure 5.** *P53* gene expression analysis.

Human HT29 and LS180 cells treated with actinomycin D or etoposide following siRNA knockdown of the *UGT1* locus were used to quantitate by real time PCR gene expression of the *p53* gene. Similar quantitation was performed using intestinal RNA from *Ugt1<sup>F/F</sup>* and *Ugt1<sup>ΔIEC</sup>* mice following DSS treatment to induce intestinal inflammation.

### Supplemental Table 1.

Sequences of the primers used in the study.

| Primer            | Forward                        | Reverse                         |
|-------------------|--------------------------------|---------------------------------|
| TNF $\alpha$      | 5'-CATCTTCTCAAATTCGAGTGACAA-3' | 5'-TGGGAGTAGACAAGGTACAACCC-3'   |
| IL-1 $\beta$      | 5'-GCAACTGTTCTGAACTCAACT-3'    | 5'-ATCTTTTGGGGTCCGTCAACT-3'     |
| IL-6              | 5'-GAGGATACCACTCCCAACAGACC-3'  | 5'-AAGTGCATCATCGTTGTTTCATACA-3' |
| IL-8              | 5'-ATGCCCTCTATTCTGCCAGAT-3'    | 5'-GTGCTCCGGTTGTATAAGATGAC-3'   |
| human P53         | 5'-GAGGTTGGCTCTGACTGTACC-3'    | 5'-TCCGTCCCAGTAGATTACCAC-3'     |
| human ATF-4       | 5'-TTAAGCCATGGCGCTTCTCA-3'     | 5'-GGTCGAAGGGGGACATCAAG-3'      |
| human sXBP-1      | 5'-TTAAGACAGCGCTTGGGGAT-3'     | 5'-GCAGAGGTGCACGTAGTCTGA-3'     |
| human GRP-78      | 5'-CCCGTGGCATAAACCCAGAT-3'     | 5'-TGGTAGGCACCACTGTGTTC-3'      |
| human GRP-94      | 5'-GCCAGTTTGGTGTCGGTTTC-3'     | 5'-GGGTAATTGTCGTTCCCCGT-3'      |
| human actin       | 5'-GGCGGCACCACCATGTACCCT-3'    | 5'-AGGGGCCGGACTCGTCATACT-3'     |
| mouse p53         | 5'-CCAAACTGCTAGCTCCCATCA-3'    | 5'-GGCCCCACTTTCTTGACCAT-3'      |
| mouse ATF-4       | 5'-AATTCGTCAACGAGCGATCC-3'     | 5'-CTGCTGCCTCTAATACGCCA-3'      |
| mouse sXBP-1      | 5'-ATCGCAGGGAGGGTCATTTG-3'     | 5'-TGGGGTCAAGAGGGTCAGAA-3'      |
| mouse GRP-78      | 5'-CGATACTGGCCGAGACAACA-3'     | 5'-GGAGGAGACACGAAGCAGAC-3'      |
| mouse GRP-94      | 5'-ACCGAAAAGGACTTGCGACT-3'     | 5'-AGCCTTCTCGGCTTTTACCC-3'      |
| mouse cyclophilin | 5'-CAGACGCCACTGTGCTTTT-3'      | 5'-TGTCTTTGGAACCTTTGTCTGCAA-3'  |

Supplement Figure 1A

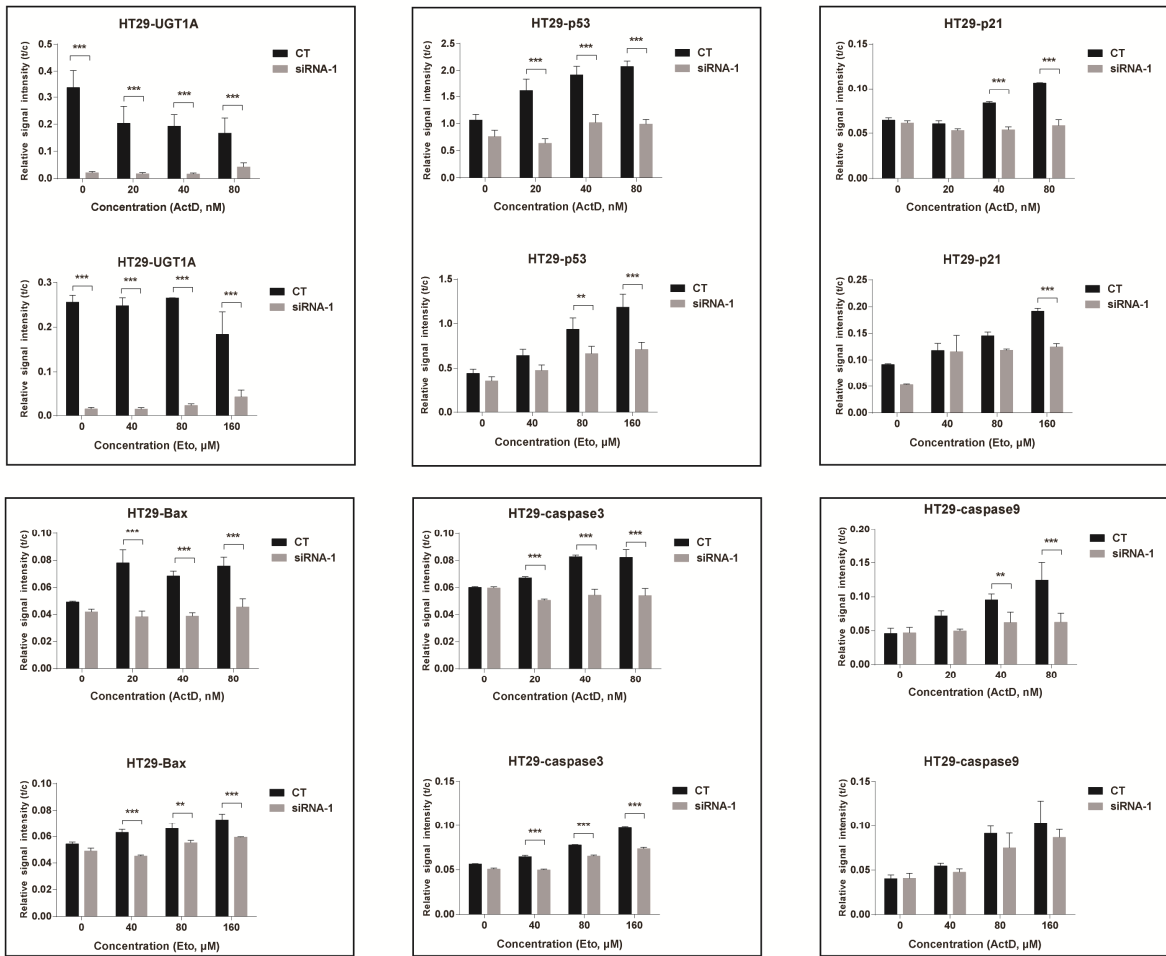

Supplement Figure 1B

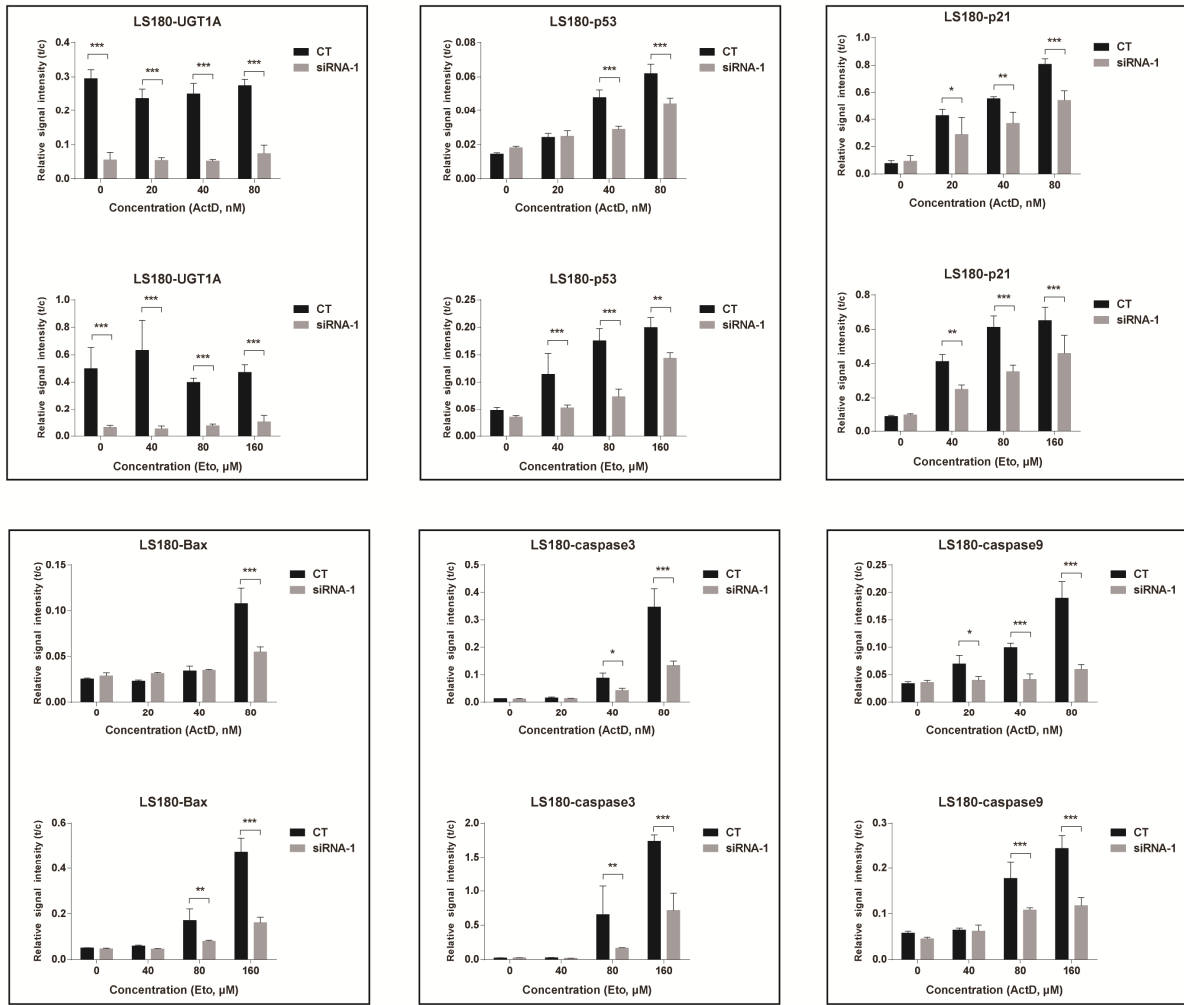

Supplemental Figure 2

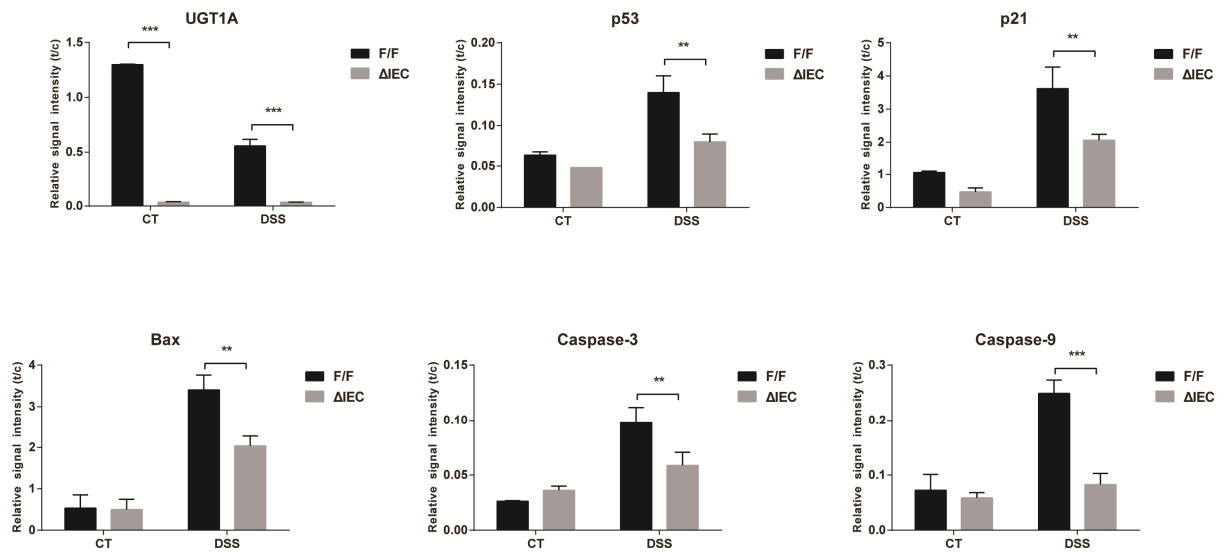

A

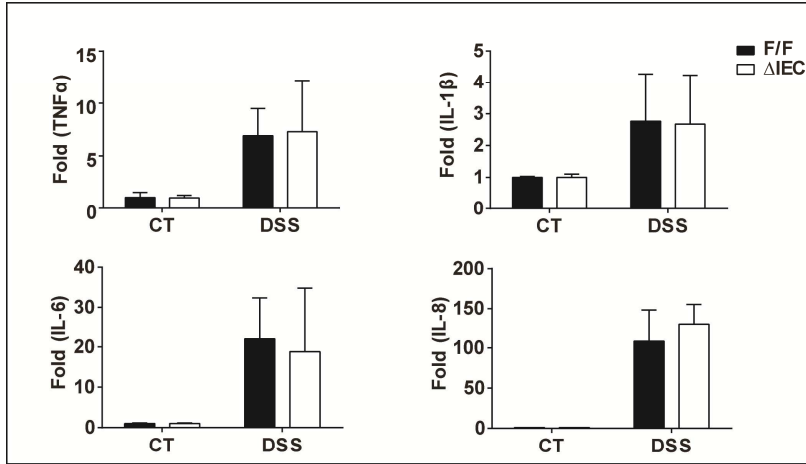

B

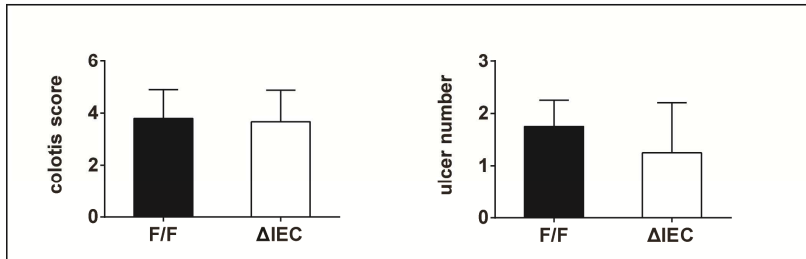

C

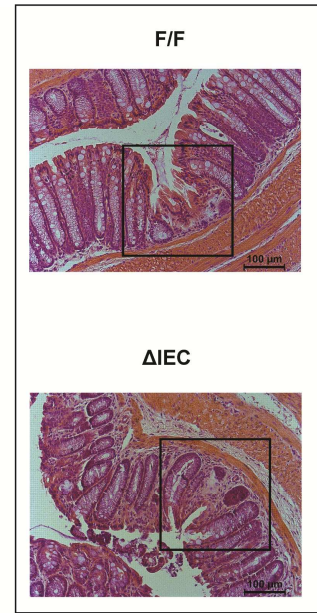

Supplemental Figure 4

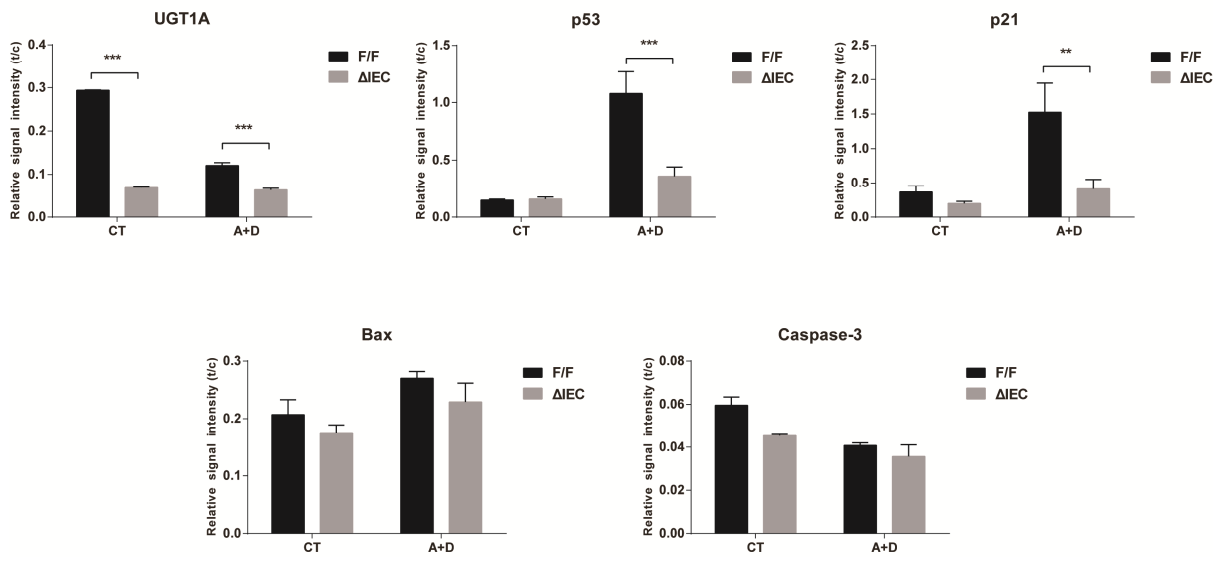



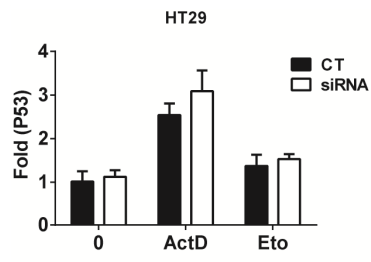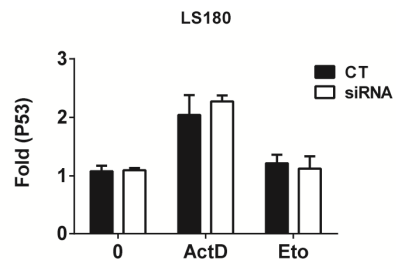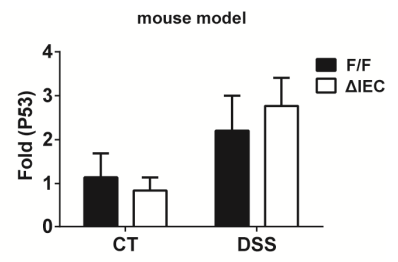

Supplement Figure 5
